# Supplementary material for: A Molecular Modeling Investigation of the Therapeutic Potential of Marine Compounds as DPP-4 Inhibitors
Source: MDPI journal article supplement (doi:10.3390/md20120777), 2022-12-13
Supplement: s1 [file s1]

# A molecular modeling investigation of the therapeutic potential of marine compounds as DPP-4 inhibitors

Priya Antony<sup>1,†</sup>, Bincy Baby<sup>1,†</sup>, Hamda Mohammed Aleissae<sup>2</sup> and Ranjit Vijayan<sup>1,3,4 \*</sup>

<sup>1</sup> Department of Biology, College of Science, United Arab Emirates University, Al Ain, United Arab Emirates

<sup>2</sup> Department of Chemistry, College of Science, United Arab Emirates University, Al Ain, United Arab Emirates

<sup>3</sup> The Big Data Analytics Center, United Arab Emirates University, PO Box 15551, Al Ain, United Arab Emirates.

<sup>4</sup> Zayed Center for Health Sciences, United Arab Emirates University, PO Box 17666, Al Ain, United Arab Emirates.

<sup>†</sup> These authors contributed equally to this work.

\* Correspondence to ranjit.v@uaeu.ac.ae (R.V.)

## SUPPLEMENTARY MATERIALS

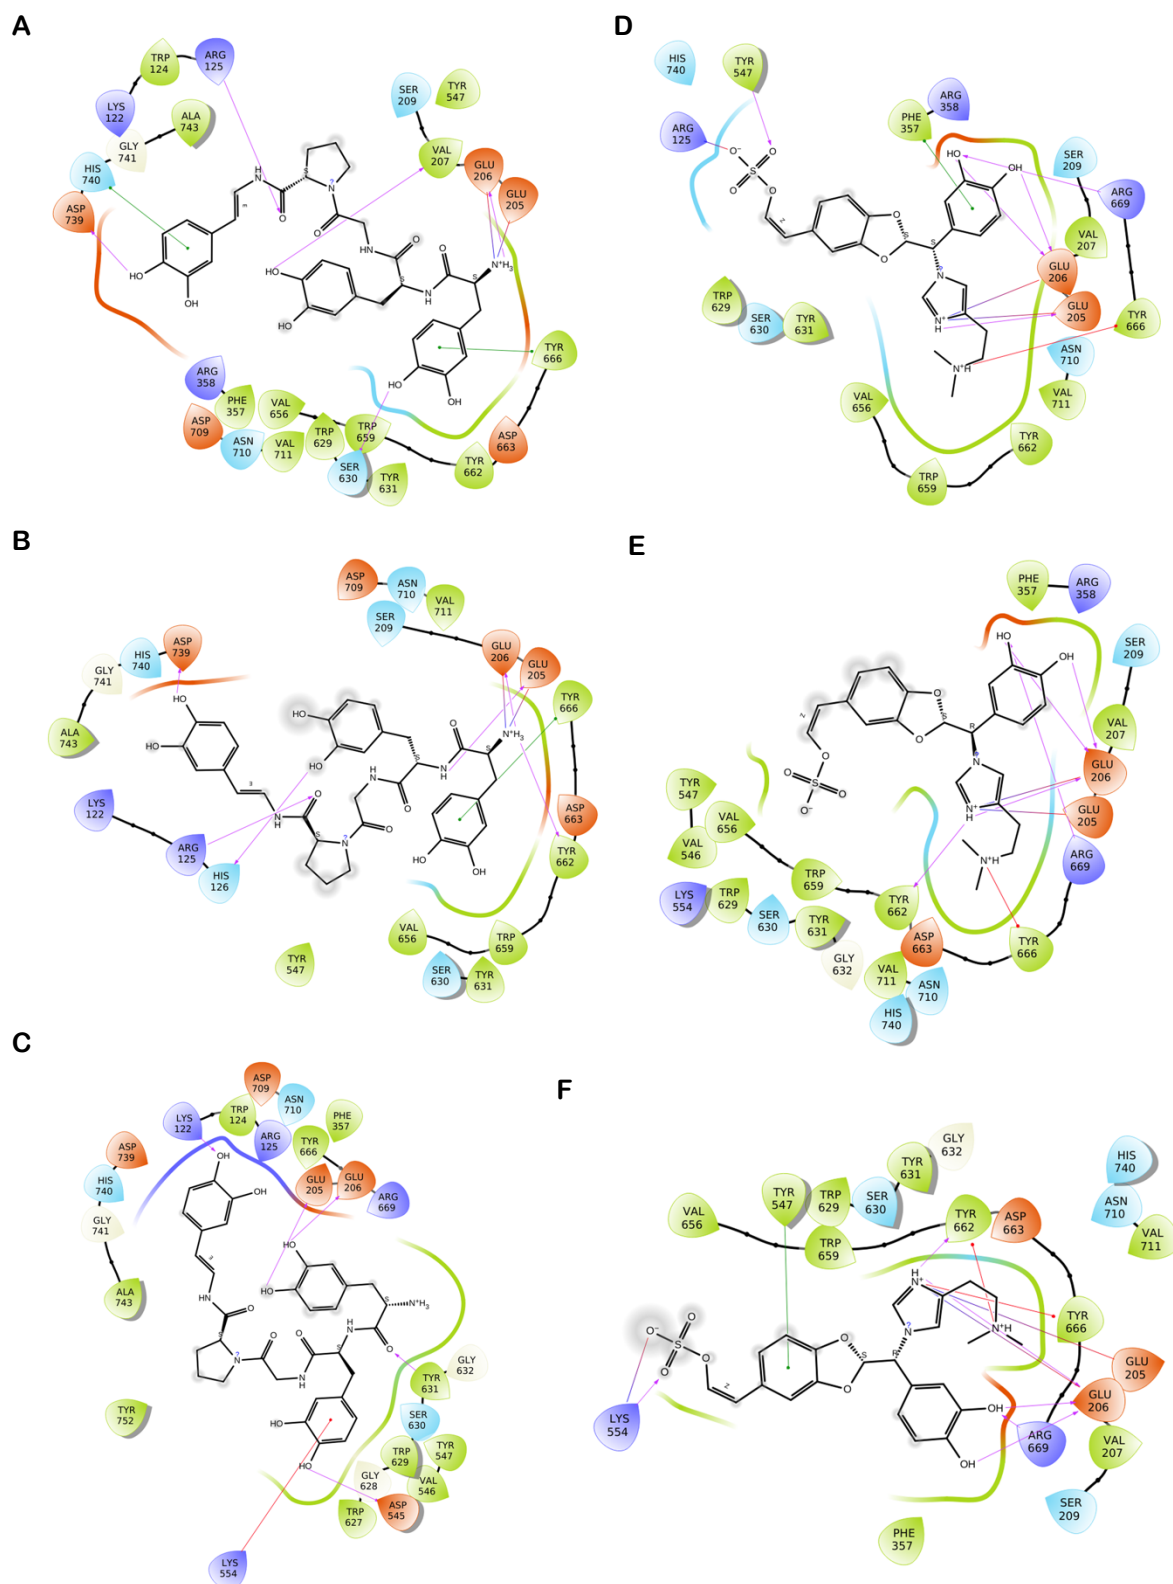

**Figure S1.** Ligand interaction diagram of DPP-4 residues that interact with the docked ligand in complexes: **(A)** 5I7U-CMNPD13046; **(B)** 5T4E-CMNPD13046; **(C)** 6B1E-CMNPD13046; **(D)** 5I7U-CMNPD17868; **(E)** 5T4E-CMNPD17868; **(F)** 6B1E-CMNPD17868 .

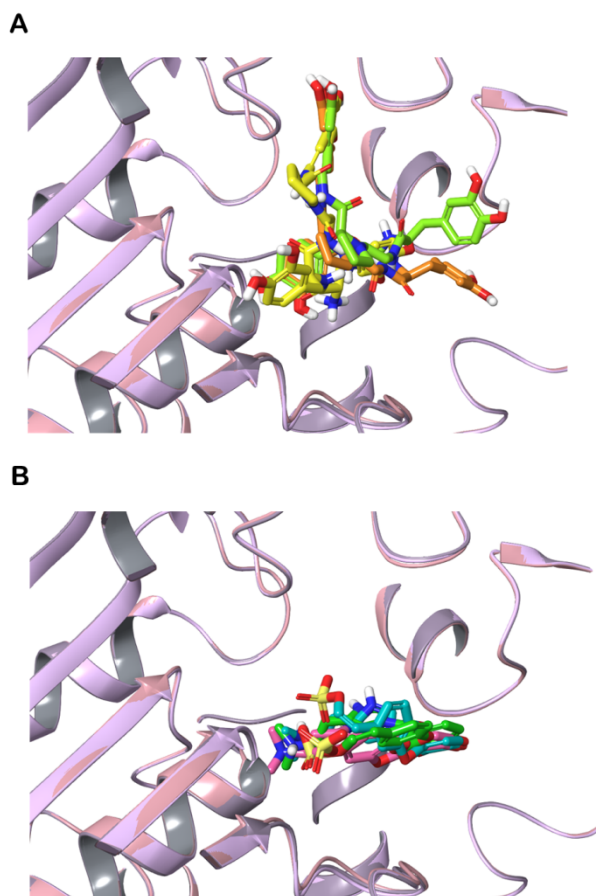

**Figure S2.** Superimposition of the docked ligands in the active site of DPP-4. **(A)** 6B1E-CMNPD13046 (orange), 5I7U-CMNPD13046 (green), and 5T4E-CMNPD13046 (yellow); **(B)** 6B1E-CMNPD17868 (cyan), 5I7U-CMNPD17868 (green), 5T4E-CMNPD17868 (pink).
